# Supplementary material for: Diverse MicroRNAs‐mRNA networks regulate the priming phase of mouse liver regeneration and of direct hyperplasia
Source: PubMed Central journal article supplement (PMC9055901; doi:10.1111/cpr.13199), 2022-02-17
Supplement: CPR-55-e13199-s001.pdf [file CPR-55-e13199-s001.pdf]

**Supplementary Figure 1. Global gene expression changes following PH or TCP treatment.**

Up- and down-regulated genes following PH and TCP treatment at 1, 3 and 6 hours. Red and green colors indicate up-regulation and down-regulation, respectively, in both experimental groups. The grey color indicates genes that do not show a similar expression pattern in both groups ( $FC \pm 1.5$ ,  $P \text{ value} \leq 0.05$ ).

**Supplementary Figure 2. PH and TCP treatment affect the pathways related to cell proliferation.**

Identification of genes categorized as Negative Regulators of Cell Proliferation and Negative Regulators of ERK1 and ERK2 deregulated 3 hours post PH. Identification of genes belonging to the category of Regulators of Cell Cycle deregulated 6 hours post TCP. (According to DAVID Functional Annotation)

**Supplementary Figure 3. DAVID functional analysis using Gene Ontology annotation.**

**A,B)** Gene Ontology enrichment analysis of biological processes for down-regulated genes at 1, 3 and 6 hours post PH (**A**) or TCP (**B**).

**Supplementary Figure 4. List of the differentially expressed miRs following PH.**

A list of the up and down-regulated miR at 1, 3 and 6 hours post-PH ( $FC \pm 1.3$ ,  $P \text{ value} \leq 0.05$ ).

**Supplementary Figure 5. List of the differentially expressed miRs following TCP.**

A list of the up and down-regulated miRs at 1, 3 and 6 hours post TCP ( $FC \pm 1.3$ ,  $P \text{ value} \leq 0.05$ ). The only up-regulated miR (miR-382-5p) is indicated in red.

**Supplementary Figure 6. QRT-PCR validation of selected genes and miRs.**

**A)** Differentially expressed genes after PH or TCP Gene expression is reported as fold change relative to livers from untreated mice. Results are expressed as means  $\pm$  SD. \* $P < 0.05$ ; \*\* $P < 0.01$ , \*\*\* $P < 0.001$ ; **B)** QRT-PCR analysis of miR-106b, miR-301b and miR-455 in mouse liver following PH or TCP. Gene expression is reported as fold change relative to livers from untreated mice.

**Supplementary Figure 7. Effect of miR-106 on Ccnd1 expression in human cell lines.**

**A)** QRT-PCR analysis of miR-106 levels in HepG2 and Malhavu hepatoma cells following miRNA transfection. MiRNA expression is reported as fold change relative to untreated cells. \*\*\* $P < 0.001$ ; **B)** Effect of transfection of miR-106 on *Ccnd1* expression. Gene expression is reported as fold change relative to untreated cells. Results are expressed as means  $\pm$  SD. \* $P < 0.05$ .

**Supplementary Table 1.** List of differentially expressed mRNA at 1, 3 and 6 hours post-PH (FC  $\pm 1.5$ , P value  $\leq 0.05$ ).

**Supplementary Table 2.** List of differentially expressed mRNA at 1, 3 and 6 hours post-TCP (FC  $\pm 1.5$ , P value  $\leq 0.05$ ).

**Supplementary Table 3.** mRNA-miR interaction networks at 1-, 3- and 6-hours post-PH or TCP treatment. Validated and predicted interactions are indicated.
